# Supplementary material for: Longitudinal Patterns of Sexually Transmitted Infection Risk Based on Psychological Characteristics and Sexual Behavior in Heterosexual Sexually Transmitted Infection Clinic Visitors
Source: PubMed Central journal article supplement — Sex Transm Dis. 2019 Dec 23;47(3):171–6. doi: 10.1097/OLQ.0000000000001110 (PMC7012346; doi:10.1097/olq.0000000000001110), 2019-12-23
Supplement: olq-47-171-s001.pdf [file olq-47-171-s001.pdf]

Dear Author,

Please review the fees to produce your figures in color in *Sexually Transmitted Diseases*. The price for the first color figure is \$650. The charge for each additional color figure is \$100.

If this charge meets with your approval, please identify which figures/pieces should be published in color, sign below, and email or fax a copy of this letter to my attention. If your institution or affiliation will cover the cost, please have your purchasing agent sign below. I will hold the color illustration(s) at my desk until I hear from you. You will be invoiced for all article charges (color separations, reprints, etc.) after publication.

If you do not wish to have your figures print in color, please indicate, "Decline Color in Print" below and fax a copy of this letter to my attention. The figures will then run in black and white in print and in color online-only. If you choose to "Decline Color in Print," please also provide grayscale versions of the figures at submission. If grayscale figures are not provided, the color figures will be converted to black and white in print.

Prompt return of the signed form, even if you choose to decline color, will avoid delays in publication.

Please note that these color charges only apply if you would like to produce your color figures in print. If you choose to "Decline Color in Print," any figures received in color will still publish in color online-only at no additional charge.

Thank you,

**X Decline Color in Print (color will be online-only)**

**Print Figures in Color**

Figures to appear in color: NA \_\_\_\_\_

Total cost for color figures: NA \_\_\_\_\_

Article Number: STD19-243 \_\_\_\_\_

Billing information:

Author's Name or Institution/Affiliation:

Minttu Rönn  
Harvard T.H. Chan School of Public Health



Minttu Rönn
